# Supplementary material for: Combining MAD and CPAP as an effective strategy for treating patients with severe sleep apnea intolerant to high-pressure PAP and unresponsive to MAD
Source: PubMed Central journal article supplement (PMC5658160; doi:10.1371/journal.pone.0187032), 2017-10-26
Supplement: pone.0187032.s001.pdf [file pone.0187032.s001.pdf]

**Table S1.** Comparison of pretreatment and P<sub>PAP</sub> of patients with MAD responder and non-responder

|                                         | responder<br>(n=6) | non-responder<br>(n=25) | <i>p</i> |
|-----------------------------------------|--------------------|-------------------------|----------|
| Age (yr)                                | 56(5.4)            | 54(13.8)                | 0.76     |
| Male (%)                                | 50                 | 80.1                    | 0.11     |
| BMI (kg/m <sup>2</sup> )                | 24.8(4.1)          | 28.8(3.4)               | 0.04     |
| CAD (%)                                 | 16.7               | 12                      | 1        |
| Hypertension (%)                        | 16.7               | 60                      | 0.08     |
| Anti-HT drug (%)                        | 16.7               | 56                      | 0.09     |
| ESS                                     | 12.7(2.6)          | 11.2(4.1)               | 0.31     |
| AHI (/hr)                               | 45.9(12.4)         | 62.3(22.1)              | 0.1      |
| P <sub>PAP</sub> * (cmH <sub>2</sub> O) | 16.7(1.8)          | 19.0(1.8)               | 0.02     |

Data presented as mean (SD) or number (%)

Abbreviations: MAD, mandibular advancement device; BMI, body mass index; CAD, coronary artery disease; HT, hypertension; ESS, Epworth Sleepiness Scale; AHI, apnea-hypopnea index; P<sub>PAP</sub>, optimal pressure of positive airway pressure therapy
