# Supplementary material for: Combining MAD and CPAP as an effective strategy for treating patients with severe sleep apnea intolerant to high-pressure PAP and unresponsive to MAD
Source: PubMed Central journal article supplement (PMC5658160; doi:10.1371/journal.pone.0187032), 2017-10-26
Supplement: pone.0187032.s002.pdf [file pone.0187032.s002.pdf]

**Table S2.** Pretreatment demographics and P<sub>PAP</sub> of 14 patients who underwent CT

|         | Age (yr) | BMI (kg/m <sup>2</sup> ) | Co-morbidity | anti-hypertensive drug | ESS | AHI (/hr) | P <sub>PAP</sub> (cm H <sub>2</sub> O) <sup>a</sup> |
|---------|----------|--------------------------|--------------|------------------------|-----|-----------|-----------------------------------------------------|
| Case 1  | 64       | 31.4                     | HT/CAD       | Yes                    | 20  | 68.4      | 20                                                  |
| Case 2  | 56       | 26.5                     | HT           | Yes                    | 8   | 48.9      | 16                                                  |
| Case 3  | 43       | 35.1                     | HT           | Yes                    | 9   | 75.7      | 20                                                  |
| Case 4  | 42       | 23.2                     | No           | No                     | 16  | 63.7      | 20                                                  |
| Case 5  | 62       | 28.8                     | No           | No                     | 14  | 45.3      | 19                                                  |
| Case 6  | 43       | 34.8                     | No           | No                     | 11  | 88        | 19                                                  |
| Case 7  | 73       | 28.9                     | HT           | Yes                    | 12  | 35.2      | 20                                                  |
| Case 8  | 34       | 29.6                     | No           | No                     | 13  | 39.5      | 17                                                  |
| Case 9  | 56       | 27.6                     | HT           | Yes                    | 12  | 50.6      | 20                                                  |
| Case 10 | 54       | 30.9                     | No           | No                     | 9   | 100.9     | 15                                                  |
| Case 11 | 35       | 29.5                     | No           | No                     | 6   | 72.2      | 20                                                  |
| Case 12 | 69       | 26.4                     | HT/CAD       | Yes                    | 13  | 50.5      | 20                                                  |
| Case 13 | 59       | 22.7                     | No           | No                     | 7   | 36.8      | 20                                                  |
| Case 14 | 62       | 25.1                     | No           | No                     | 20  | 52.4      | 20                                                  |

Abbreviations: CT, combination therapy; BMI, body mass index; ESS, Epworth Sleepiness Scale; AHI, apnea-hypopnea index; P<sub>PAP</sub>, optimal pressure of positive airway pressure therapy; HT, hypertension; CAD, coronary artery disease. <sup>a</sup>: For patients who transitioned to bilateral positive airway pressure (BPAP), the optimal therapeutic pressure was recorded as 20 cm H<sub>2</sub>O.
