# Supplementary material for: Combining MAD and CPAP as an effective strategy for treating patients with severe sleep apnea intolerant to high-pressure PAP and unresponsive to MAD
Source: PubMed Central journal article supplement (PMC5658160; doi:10.1371/journal.pone.0187032), 2017-10-26
Supplement: pone.0187032.s003.pdf [file pone.0187032.s003.pdf]

**Table S3.** Apnea-hypopnea index (AHI) before and under treatment for the 14 patients who underwent CT

|         | Pretreatment (/hr) | PAP (/hr) | MAD (/hr) | CT (/hr) |
|---------|--------------------|-----------|-----------|----------|
| Case 1  | 68.4               | 33.6      | 36        | 2.8      |
| Case 2  | 48.9               | 16.9      | 18.8      | 0.7      |
| Case 3  | 75.7               | 19.9      | 69.7      | 1.9      |
| Case 4  | 63.7               | 31.9      | 23.6      | 5.2      |
| Case 5  | 45.3               | 14.4      | 53.4      | 2.1      |
| Case 6  | 88                 | 11.5      | 75.1      | 1.4      |
| Case 7  | 35.2               | 41.7      | 40.6      | 1        |
| Case 8  | 39.5               | 26.2      | 61        | 7.2      |
| Case 9  | 50.6               | 19.6      | 21.2      | 7.5      |
| Case 10 | 100.9              | 23.3      | 35.3      | 3.9      |
| Case 11 | 72.2               | 29.6      | 64.1      | 17.5     |
| Case 12 | 50.5               | 19.5      | 53.9      | 0.9      |
| Case 13 | 36.8               | 22.4      | 16.2      | 6.2      |
| Case 14 | 52.4               | 36.4      | 37.5      | 2.6      |
| Mean    | 59.2               | 24.8      | 43.3      | 4.4      |
| SD      | 19.4               | 8.8       | 19.7      | 4.4      |

Abbreviations: PAP, positive airway pressure; MAD, mandibular advancement device; CT, combination therapy; SD, standard deviation
