# Supplementary material for: Combining MAD and CPAP as an effective strategy for treating patients with severe sleep apnea intolerant to high-pressure PAP and unresponsive to MAD
Source: PubMed Central journal article supplement (PMC5658160; doi:10.1371/journal.pone.0187032), 2017-10-26
Supplement: pone.0187032.s004.pdf [file pone.0187032.s004.pdf]

**Table S4.** Oxygen desaturation index (ODI) before and under treatment for the 14 patients who underwent CT

|         | Pretreatment | PAP  | MAD  | CT   |
|---------|--------------|------|------|------|
| Case 1  | 64.7         | 34.9 | 35.7 | 1.7  |
| Case 2  | 45.2         | 16   | 20.6 | 0.7  |
| Case 3  | 69.8         | 17   | 69   | 1.8  |
| Case 4  | 53.6         | 6    | 18   | 4.6  |
| Case 5  | 45.4         | 13.5 | 53.8 | 2.7  |
| Case 6  | 91.4         | 12.8 | 74.7 | 20.7 |
| Case 7  | 36.6         | 17.7 | 42.2 | 1.2  |
| Case 8  | 40           | 25.3 | 59.6 | 3.1  |
| Case 9  | 48.8         | 12.9 | 25.8 | 11   |
| Case 10 | 97.8         | 21   | 33.6 | 4.2  |
| Case 11 | 84.4         | 37.6 | 58.2 | 14.2 |
| Case 12 | 47.3         | 17.2 | 53.7 | 1    |
| Case 13 | 34.2         | 21.9 | 17   | 8.3  |
| Case 14 | 58.5         | 30.6 | 44.2 | 2.7  |
| Mean    | 58.4         | 20.3 | 43.3 | 5.6  |
| SD      | 20.5         | 9    | 18.9 | 5.9  |

Abbreviations: PAP, positive airway pressure; MAD, mandibular advancement device; CT, combination therapy; SD, standard deviation
