# Supplementary material for: Combining MAD and CPAP as an effective strategy for treating patients with severe sleep apnea intolerant to high-pressure PAP and unresponsive to MAD
Source: PubMed Central journal article supplement (PMC5658160; doi:10.1371/journal.pone.0187032), 2017-10-26
Supplement: pone.0187032.s005.pdf [file pone.0187032.s005.pdf]

**Table S5.** % total sleep time (TST) of SpO<sub>2</sub> <90% before and under treatment for the 14 patients who underwent CT

|         | Pretreatment | PAP  | MAD  | CT  |
|---------|--------------|------|------|-----|
| Case 1  | 6.8          | 3.2  | 1.5  | 0.3 |
| Case 2  | 26.8         | 0.3  | 0.8  | 0   |
| Case 3  | 27.7         | 2.4  | 30.9 | 0   |
| Case 4  | 4.2          | 0.4  | 1.6  | 0.2 |
| Case 5  | 19.9         | 0.5  | 6.1  | 0   |
| Case 6  | 27.5         | 0.3  | 3.9  | 0.1 |
| Case 7  | 21.8         | 0.2  | 19.6 | 0   |
| Case 8  | 10.2         | 4.8  | 16.5 | 0.3 |
| Case 9  | 20.9         | 0.9  | 1.3  | 0   |
| Case 10 | 30.5         | 0.4  | 1.9  | 0.5 |
| Case 11 | 49           | 3.1  | 15.7 | 0.2 |
| Case 12 | 6.2          | 0.5  | 20   | 0   |
| Case 13 | 22.9         | 10.4 | 10   | 2   |
| Case 14 | 45.6         | 1.6  | 5.5  | 0   |
| Mean    | 22.9         | 2.1  | 9.7  | 0.3 |
| SD      | 13.5         | 2.8  | 9.4  | 0.5 |

Abbreviations: PAP, positive airway pressure; MAD, mandibular advancement device; CT, combination therapy; SD, standard deviation
